# Supplementary material for: Antibiotic Use and Misuse in Dentistry in India—A Systematic Review
Source: MDPI journal article supplement (doi:10.3390/antibiotics10121459), 2021-11-26
Supplement: s1 [file s1]

## SUPPLEMENTARY DATA

**Table S1.** Search strategy used to identify relevant papers.

### **a) Databases – MEDLINE (Ovid), EMBASE, Global Health, International Pharmaceutical Abstracts.**

- 
- (antibiotic\* or antimicrobial\* or antibacterial\*).ti,ab.
  2. exp Anti-Bacterial Agents/
  3. exp Drug Resistance, Microbial/
  4. 1 or 2 or 3
  5. (prescri\* or overprescri\* or underprescri\* or self-prescri\* or "use" or usage or overuse or misuse or abuse or consumption or consume or rate or audit or survey or questionnaire\* or pattern or trend\* or stewardship or knowledge or appropriate or inappropriate or prophyla\* or therap\*).ti,ab.
  6. exp Prescriptions/ or exp Drug Prescriptions/
  7. exp "Surveys and Questionnaires"/
  8. exp health knowledge, attitudes, practice/ or exp "treatment adherence and compliance"/
  9. exp Antibiotic Prophylaxis/
  10. exp inappropriate prescribing/ or exp self medication/
  11. exp community health services/ or exp emergency medical services/ or exp rural health services/
  12. exp allied health personnel/ or exp personnel, hospital/ or exp pharmacists/ or exp physicians/
  13. 5 or 6 or 7 or 8 or 9 or 10 or 11 or 12
  14. (dental or dentist\* or odontogenic or tooth or teeth or orofacial or dentoalveolar or implant or "p\*ediatric dental" or endodonti\* or periodont\* or pulp\* or periapical or "root canal" or extraction\*).ti,ab.
  15. (oral adj2 (surg\* or infection\* or disease\* or problem\* or healthcare or health or infection\* or abscess\*)).ti,ab.
  16. exp Dentists/
  17. exp Dentistry/
  18. 14 or 15 or 16 or 17
  19. India\*.ti,ab.
  20. exp India/
  20. 19 or 20
  22. 4 and 13 and 18 and 21
- 

### **b) Database - Cochrane.**

- 
- #1 (antibiotic\* or antimicrobial\* or antibacterial\*):ti,ab,kw 43984
  - #2 MeSH descriptor: [Drug Resistance, Microbial] explode all trees 2343
  - #3 #1 OR #2 45302
  - #4 (prescri\* or overprescri\* or underprescri\* or self-prescri\* or "use" or usage or overuse or misuse or abuse or consumption or consume or rate audit or survey or questionnaire\* or pattern or trend\* or stewardship or knowledge or appropriate or inappropriate or prophyla\* or therap\*):ti,ab,kw 1109004
  - #5 MeSH descriptor: [Prescriptions] explode all trees 1076
  - #6 MeSH descriptor: [Inappropriate Prescribing] explode all trees 166
  - #7 MeSH descriptor: [Drug Misuse] explode all trees 247
  - #8 MeSH descriptor: [Health Knowledge, Attitudes, Practice] explode all trees 6205
  - #9 MeSH descriptor: [Surveys and Questionnaires] explode all trees 57141
  - #10 MeSH descriptor: [Self Medication] explode all trees 87
  - #11 MeSH descriptor: [Practice Patterns, Physicians'] explode all trees 1280
  - #12 MeSH descriptor: [Antibiotic Prophylaxis] explode all trees 1316
  - #13 MeSH descriptor: [Allied Health Personnel] explode all trees 1255
  - #14 MeSH descriptor: [Community Health Services] explode all trees 14636
  - #15 MeSH descriptor: [Emergency Medical Services] explode all trees 4194
  - #16 MeSH descriptor: [Rural Health Services] explode all trees 355
  - #17 #4 OR #5 OR #6 OR #7 OR #8 OR #9 OR #10 OR #11 OR #12 OR #13 OR #14 OR #15 OR #16 1117247
-

---

#18 (dental or dentist\* or odontogenic or tooth or teeth or orofacial or dentoalveolar or implant or "p\*ediatric dental" or endodonti\* or periodont\* or pulp\* or periapical or "root canal" or extraction\*):ti,ab,kw 64467

#19 (oral adj2 (surg\* or infection\* or disease\* or problem\* or healthcare or health or infection\* or abscess\*)):ti,ab,kw 0

#20 MeSH descriptor: [Dentists] explode all trees 102

#21 MeSH descriptor: [Dentistry] explode all trees 18363

#22 #18 OR #19 OR #20 OR #21 65985

#23 India\*:ti,ab,kw 13112

#24 MeSH descriptor: [India] explode all trees 2295

#25 #23 OR #24 13112

#26 #3 AND #17 AND #22 3573

#27 #25 AND #26 52

---

### c) Database- CINAHL.

---

S1 (MH "Antibiotics+") OR (MH "Drug Resistance, Microbial+")

S2 TI ( (antibiotic\* or antimicrobial\* or antibacterial\* ) OR AB ( (antibiotic\* or antimicrobial\* or antibacterial\* )

S3 S1OR S2

S4 (MH "Inappropriate Prescribing") OR (MH "Prescriptions, Drug+") OR (MH "Self Medication")

S5 (MH "Surveys+") OR (MH "Questionnaires+")

S6 (MH "Attitude to Health+") OR (MH "Patient Compliance+") OR (MH "Dentist Attitudes")

S7 (MH "Personnel, Health Facility+") OR (MH "Allied Health Personnel+") OR (MH "Physicians+") OR (MH "Pharmacists") OR (MH "Health Personnel, Unlicensed")

S8 (MH "Emergency Medical Services+") OR (MH "Community Health Services+") OR (MH "Rural Health Services")

S9 (MH "Antibiotic Prophylaxis")

S10 TI ( prescri\* or overprescri\* or underprescri\* or self-prescri\* or "use" or usage or overuse or misuse or abuse or consumption or consume or rate or audit or survey or questionnaire\* or pattern or trend\* or stewardship or knowledge or appropriate or inappropriate or prophyla\* or therap\* ) OR AB ( prescri\* or overprescri\* or underprescri\* or self-prescri\* or "use" or usage or overuse or misuse or abuse or consumption or consume or rate or audit or survey or questionnaire\* or pattern or trend\* or stewardship or knowledge or appropriate or inappropriate or prophyla\* or therap\* )

S11 S4ORS5ORS6ORS7ORS8ORS9OR S10

S12 (MH "Dentists+")

S13 (MH "Dentistry+")

S14 TI ( dental or dentist\* or odontogenic or tooth or teeth or orofacial or dentoalveolar or implant or "p\*ediatric dental" or endodonti\* or periodont\* or pulp\* or periapical or "root canal" or extraction\* ) OR AB ( dental or dentist\* or odontogenic or tooth or teeth or orofacial or dentoalveolar or implant or "p\*ediatric dental" or endodonti\* or periodont\* or pulp\* or periapical or "root canal" or extraction\* )

S15 TI ( oral n2 (surg\* or infection\* or disease\* or problem\* or healthcare or health or infection\* or abscess\* ) OR AB ( oral n2 (surg\* or infection\* or disease\* or problem\* or healthcare or health or infection\* or abscess\* )

S16 S12ORS13ORS14ORS15

S17 (MH "India")

S18 TI India\* OR AB India\*

S19 S17 OR S18

S20 S3 AND S11 AND S16 AND S19

---

### d) Database- Web of Science.

---

antibiotic\* or antimicrobial\* or antibacterial\* (Topic) and

prescri\* or overprescri\* or underprescri\* or self-prescri\* or "use" or usage or overuse or misuse or abuse or consumption or consume or rate or audit or survey or questionnaire\* or pattern or trend\* or stewardship or knowledge or appropriate or inappropriate or prophyla\* or therap\* (Topic) and

---

dental or dentist\* or odontogenic or tooth or teeth or orofacial or dentoalveolar or implant or "p\*ediatric dental" or endodonti\* or periodont\* or pulp\* or periapical or "root canal" or extraction\* (Topic) and India\* (Topic)

**Table S2. DATA EXTRACTION FORM - ANTIBIOTIC USE.**

**Study Name:**

**Author:**

**Year:**

**Journal/type of publication:**

**Funding source:** Not reported ✓

**Aim:**

**Study Design:** Cross-sectional  
Other (please specify)

**Study Setting:**

Primary care  
Tertiary care hospital Urban/Rural  
Tertiary care teaching hospital  
Health Centre  
Research Institute  
Other: \_\_\_\_\_

**Study Population:**

**Approach used:** Questionnaire/prescription audit/ Other

**Study period and duration:**

**Translation to local language/language of convenience done (if applicable):** Yes/No – English/Hindi/Marathi/Kannada

**Inclusion criteria:**

**Exclusion criteria:**

**EVALUATING ACTUAL PRESCRIBING PATTERN OF ANTIBIOTICS**

**Number recruited:**

**Number reported:**

Child/Adult  
Male/Female/both  
Urban/Rural  
U/UM/LM/UL/L

**Demographic details (if any)**

Age range =  
Mean age =  
Male: Female =

**Statistical analysis:**

**OUTCOME**

**Rate of antibiotic prescription among all study participants =**

**Rate of prescriptions with antibiotics =**

**Rate of antibiotics prescribed among all prescription drugs (as often more than one antibiotic can be included in a prescription) =**

**Antibiotic combinations (more than 1 antibiotic) =**

**Indications for Antibiotic prescription**

| Author | Indications for Antibiotic prescription               |                               |
|--------|-------------------------------------------------------|-------------------------------|
| &      | Clinical indications (therapeutic(T)/Prophylactic (P) | Non-clinical reasons (if any) |
| Year   |                                                       |                               |

| Name | T/P | n | % | Name | n | % | Type and regimen<br>(if available) | Rate |
|------|-----|---|---|------|---|---|------------------------------------|------|
|------|-----|---|---|------|---|---|------------------------------------|------|

## EVALUATING SELF-MEDICATION

Number recruited:

Number reported:

Child/Adult

Male/Female/both

Urban/Rural

U/UM/LM/UL/L

Male: Female

Age range

Mean age:

Statistical analysis:

OUTCOMES :

Prevalence of self-med for oral/dental problems: n= ( %)

Most common age group (if available):

Prevalence of antibiotic use among all self-medications:

Reasons for self-medication:

Sources of drugs

Effect of self-medication

Side effects and their rate (if any mentioned)

Knowledge about Ab use and AMR:

Emerging themes:

## EVALUATING KNOWLEDGE/ PRACTICE OF PRESCRIBERS

Population assessed:

Number recruited:

Number reported:

Response rate:

Male: Female =

| Demographic Characteristics of Study Population |                                 |                              |                             |                    |         |     |          |      |
|-------------------------------------------------|---------------------------------|------------------------------|-----------------------------|--------------------|---------|-----|----------|------|
| Qualifications (Dental)                         |                                 |                              |                             |                    | Gender  |     |          |      |
| UG students                                     | Vocational<br>Trainees/ interns | Graduates<br>and PG trainees | Specialist<br>qualification | Work<br>experience | M<br>N= | M % | F<br>N = | F% = |

## OUTCOME

| Condition/conditions assessed | T/P* | N = | % | Antibiotics used                                                                 |  | N= | % |
|-------------------------------|------|-----|---|----------------------------------------------------------------------------------|--|----|---|
|                               |      |     |   | (if mentioned separately for acute /chronic conditions; penicillin allergic pts) |  |    |   |

\* T= Therapeutic; P= Prophylactic.

Statistical analysis:

Antibiotic of choice = ----- (n= ; % = )

Dose and duration (regimen)=

Antibiotic of choice for penicillin allergy patients = ----- (n= ; % = )

Dose and duration =

Adverse reactions to antibiotics reported = ( %)

% of subjects confident in prescribing antibiotics=

Based on questionnaire, %age showing good knowledge in prescribing drugs =

M = ( %); F = ( %)

Sources of prescription information:

Notes and themes:

ARTICLE INCLUDED FOR ANALYSIS: YES/NO

**Table S3. a:** Quality Assessment of Included studies using AXIS tool.

| Study             | Outcome                       | 1. Clear aims | 2. Study design | 3. Sample size | 4. Defined target Popln defined | 5. Representative sample | 6. Selection process | 7. Non-responders | 8. Measurements appropriate | 9. Correctly measured/piloted | 10. Statistical significance | 11. Methods Repeatable | 12. Basic data | 13. Response rate concerns | 14. Non-responders' info | 15. Results consistent | 16. All analysis described | 17. Discuss' n/concl' n justified | 18. Limitations | 19. Conflicts | 20. Ethics/ consent | Overall score |    |
|-------------------|-------------------------------|---------------|-----------------|----------------|---------------------------------|--------------------------|----------------------|-------------------|-----------------------------|-------------------------------|------------------------------|------------------------|----------------|----------------------------|--------------------------|------------------------|----------------------------|-----------------------------------|-----------------|---------------|---------------------|---------------|----|
| Bhattacharya 2012 | Ab prescription               | Y             | Y               | Y/nc           | Y                               | Y                        | N                    | N                 | Y                           | N                             | N                            | N                      | N              | D                          | N                        | N                      | N                          | N                                 | N               | Y             | 8                   |               |    |
| Borole 2013       | Ab prescription               | N             | Y               | N/nc           | N                               | N                        | N                    | N                 | N                           | N                             | N                            | N                      | N              | D                          | N                        | N                      | N                          | N                                 | N               | N             | N                   | 3             |    |
| Chandy 2016       | Ab prescription               | Y             | Y               | Y/nc           | Y                               | Y                        | Y                    | N/a               | Y                           | Y                             | Y                            | Y                      | Y              | n/a                        | n/a                      | Y                      | Y                          | Y                                 | Y               | N             | Y                   | 20            |    |
| Datta 2015        | Ab prescription               | Y             | Y               | Y/nc           | Y                               | Y                        | N                    | N                 | Y                           | Y                             | N                            | Y                      | N              | D                          | N                        | N                      | Y                          | N                                 | N               | N             | Y                   | 11            |    |
| DeepInder 2019    | Ab prescription               | Y             | Y               | Y/nc           | Y                               | Y                        | d/n                  | d/n               | Y                           | Y                             | N                            | N                      | N              | D                          | N                        | N                      | N                          | N                                 | Y               | N             | Y                   | 10            |    |
| Fayisa 2019       | Ab prescription               | Y             | Y               | Y/nc           | Y                               | Y                        | Y                    | N                 | Y                           | Y                             | N                            | Y                      | Y              | D                          | N                        | N                      | N                          | N                                 | Y               | N             | Y                   | 13            |    |
| Jayanthi 2014     | Ab prescription               | Y             | Y               | Y              | Y                               | Y                        | D                    | N                 | Y                           | Y                             | Y                            | Y                      | N              | D                          | N                        | N                      | N                          | N                                 | N               | N             | Y                   | 12            |    |
| Kaikade 2016      | Ab prescription               | Y             | Y               | Y/nc           | Y                               | Y                        | N                    | N                 | Y                           | Y                             | N                            | N                      | N              | D                          | N                        | N                      | N                          | N                                 | N               | N             | Y                   | 9             |    |
| Khare 2019        | Ab prescription               | Y             | Y               | Y?             | Y                               | Y                        | N                    | D                 | N                           | Y                             | Y                            | Y                      | Y              | D                          | N                        | N                      | Y                          | Y                                 | Y               | Y             | N                   | Y             | 16 |
| Patel NN 2014     | Ab prescription               | Y             | Y               | Y/nc           | Y                               | Y                        | N                    | N                 | Y                           | Y                             | N                            | N                      | Y              | D                          | N                        | N                      | Y                          | N                                 | N               | N             | Y                   | 11            |    |
| Patel PS 2016     | Ab prescription               | Y             | Y               | Y              | Y                               | Y                        | Y                    | N                 | Y                           | Y                             | N                            | N                      | N              | N                          | N                        | Y                      | N                          | N                                 | Y               | N             | Y                   | 15            |    |
| Salman 2009       | Ab prescription               | Y             | Y               | N              | Y                               | N                        | N                    | N                 | N                           | N                             | N                            | N                      | N              | n/r                        | N                        | N                      | N                          | N                                 | N               | N             | N                   | 4             |    |
| Sharma 2014       | Ab prescription               | Y             | Y               | Y              | Y                               | Y                        | N                    | N                 | Y                           | Y                             | N                            | N                      | N              | D                          | N                        | N                      | Y                          | N                                 | N               | N             | Y                   | 10            |    |
| Suhaib 2017       | Ab prescription               | Y             | Y               | N              | Y                               | Y                        | N                    | N                 | Y                           | Y                             | Y                            | Y                      | Y              | N                          | Y                        | Y                      | Y                          | N                                 | N               | N             | N                   | 14            |    |
|                   |                               |               |                 |                |                                 |                          |                      |                   |                             |                               |                              |                        |                |                            |                          |                        |                            |                                   |                 |               |                     |               |    |
| Dhaimade 2018     | Self-medication               | Y             | Y               | Y              | Y                               | Y                        | N                    | n/a               | Y                           | Y                             | Y                            | Y                      | Y              | N                          | n/a                      | N                      | Y                          | Y                                 | N               | N             | Y                   | 17            |    |
| Giriraju 2014     | Self-medication               | Y             | Y               | Y              | Y                               | Y                        | N                    | n/a               | Y                           | N                             | N                            | Y                      | Y              | N                          | n/a                      | N                      | Y                          | Y                                 | N               | N             | Y                   | 15            |    |
| KomalRaj 2015     | Self-medication               | Y             | Y               | Y              | Y                               | Y                        | N                    | n/a               | Y                           | N                             | N                            | N                      | Y              | N                          | n/a                      | N                      | Y                          | Y                                 | N               | N             | Y                   | 14            |    |
| Shamsudeen 2018   | Self-medication               | Y             | Y               | Y              | Y                               | Y                        | Y                    | d/n               | Y                           | Y                             | Y                            | Y/dn                   | N              | D/n                        | d/n                      | N                      | Y                          | N                                 | N               | N             | Y                   | 13            |    |
| Simon 2015        | Self-medication               | Y             | Y               | Y              | Y                               | Y                        | N                    | n/a               | Y                           | Y                             | Y                            | Y                      | Y              | N                          | n/a                      | N                      | Y                          | Y                                 | Y               | N             | Y                   | 18            |    |
| Sultane 2017      | Self-medication               | Y             | Y               | Y              | Y                               | Y                        | N                    | n/a               | Y                           | Y                             | N                            | Y                      | Y              | N                          | n/a                      | N                      | Y                          | N                                 | N               | N             | Y                   | 15            |    |
| Gandhi 2016       | Self-medication               | Y             | Y               | Y              | Y                               | Y                        | Y                    | D                 | N                           | Y                             | Y                            | N                      | Y              | Y                          | N/dn                     | N/dn                   | Y                          | Y                                 | N               | N             | N                   | Y             | 14 |
| Rawlani 2015      | Self-medication               | Y             | Y               | Y              | Y                               | Y                        | N                    | d/n               | Y                           | N                             | Y                            | Y                      | Y              | N/dn                       | N/dn                     | N                      | N                          | N                                 | Y               | N             | Y                   | 12            |    |
| Mahmoud MA 2019   | Self-medication               |               |                 |                |                                 |                          |                      | N/dn              |                             |                               |                              |                        |                | D                          | N                        | D                      |                            |                                   |                 |               |                     | 12            |    |
|                   |                               |               |                 |                |                                 |                          |                      |                   |                             |                               |                              |                        |                |                            |                          |                        |                            |                                   |                 |               |                     |               |    |
| Datta 2014        | Prescriber Knowledge/practice | Y             | Y               | N              | Y                               | Y                        | N                    | N                 | Y                           | N                             | N                            | N                      | N              | N                          | N                        | N                      | Y                          | Y                                 | N               | N             | Y                   | 10            |    |

|                    |                                            |   |   |      |   |   |   |     |   |     |   |      |   |      |      |      |   |      |   |   |   |    |
|--------------------|--------------------------------------------|---|---|------|---|---|---|-----|---|-----|---|------|---|------|------|------|---|------|---|---|---|----|
| Garg 2013          | Prescriber Knowledge/practice              | Y | Y | N    | Y | N | Y | N   | Y | N   | Y | N    | N | Y    | N    | N    | Y | Y    | N | N | Y | 10 |
| Goud 2012          | Prescriber Knowledge/practice              | Y | Y | Y    | Y | Y | N | N   | Y | Y   | Y | N    | N | Y    | N    | N    | Y | Y    | N | N | Y | 12 |
| Gour 2013          | Prescriber Knowledge/practice              | Y | Y | N    | Y | Y | N | N   | Y | Y   | N | N    | N | N    | N    | N    | Y | N    | N | N | Y | 10 |
| Gowri 2015         | Prescriber Knowledge/practice              | Y | Y | N/dn | Y | Y | Y | n/a | Y | Y   | Y | N    | N | N    | n/a  | Y    | N | N    | N | N | Y | 14 |
| Harsh Vardhan 2017 | Prescriber Knowledge/practice              | Y | Y | N    | Y | N | N | N   | N | N   | Y | Y    | N | Y    | N    | N    | Y | Y    | N | N | Y | 9  |
| Jayadev 2014       | Prescriber Knowledge/practice              | Y | Y | N    | Y | Y | N | N   | Y | N   | N | N    | Y | N    | N    | N    | Y | Y    | N | N | Y | 11 |
| Karibasappa 2014   | Prescriber Knowledge/practice              | Y | Y | Y    | Y | N | Y | n/a | Y | Y   | Y | Y    | Y | Y    | N    | n/a  | Y | Y    | N | N | Y | 17 |
| Kaul 2018          | Prescriber Knowledge/practice              | Y | Y | N    | Y | N | N | N   | Y | Y   | Y | N    | Y | Y    | N    | N    | Y | N    | Y | N | Y | 11 |
| Konde 2017         | Prescriber Knowledge/practice              | Y | Y | N    | Y | Y | N | DN  | Y | Y   | Y | N    | N | DN   | DN   | N    | N | N    | N | N | Y | 9  |
| Kumar 2013         | Prescriber Knowledge/practice              | Y | Y | N    | Y | N | Y | N   | Y | N   | Y | N    | Y | N    | N    | N    | Y | N    | N | N | Y | 11 |
| Nandkeoliar 2016   | Prescriber Knowledge/practice              | Y | Y | Y    | Y | N | Y | N   | Y | N   | N | N    | N | N    | N    | N    | Y | Y    | Y | N | Y | 12 |
| Naveen 2015        | Prescriber Knowledge/practice              | Y | Y | Y    | Y | Y | N | N   | Y | Y   | N | N    | N | N    | N    | Y    | Y | Y    | Y | N | Y | 14 |
| Padda 2016         | Prescriber Knowledge/practice              | Y | Y | N    | Y | Y | N | N/A | Y | Y   | N | N    | N | N    | N/A  | N    | Y | N    | N | N | Y | 12 |
| Patait 2015        | Prescriber Knowledge/practice              | Y | Y | N    | Y | N | N | N   | Y | N   | N | N    | N | N    | N    | Y    | N | N    | N | N | Y | 8  |
| Peedikayil 2012    | Prescriber Knowledge/practice              | Y | Y | N    | Y | N | N | N   | Y | N   | N | Y    | Y | N    | N    | N    | Y | Y    | Y | N | Y | 12 |
| Punj 2018          | Prescriber Knowledge/practice              | Y | Y | N    | Y | Y | N | N/d | Y | N   | N | Y    | Y | D/N  | N/dn | N    | N | N    | N | N | Y | 9  |
| Puranik 2018       | Prescriber Knowledge/practice              | Y | Y | Y    | Y | Y | N | N/A | Y | Y   | Y | Y    | Y | Y    | N    | N/A  | Y | Y    | N | Y | N | 18 |
| Saini 2014         | Prescriber Knowledge/practice              | Y | Y | N    | Y | Y | N | N   | N | N   | N | N    | N | N    | N    | N    | N | N    | N | N | Y | 7  |
| Sam Prasad 2017    | Prescriber Knowledge/practice              | Y | Y | N    | Y | Y | N | N/A | N | N   | N | N    | Y | N    | N/A  | N    | N | N    | N | N | Y | 10 |
| Shafia 2019        | Prescriber Knowledge/practice              | Y | Y | Y    | Y | Y | N | N   | Y | N   | Y | N    | N | N    | N    | N    | N | N    | N | N | Y | 10 |
| Srinivasan 2017    | Prescriber Knowledge/practice              | Y | Y | N    | Y | N | Y | N   | Y | Y   | Y | Y    | Y | N/dn | N    | N    | Y | Y    | Y | N | Y | 14 |
| Wasan 2017         | Prescriber Knowledge/practice              | Y | Y | Y    | Y | Y | N | N   | Y | Y   | Y | Y    | Y | N    | Y    | N    | Y | Y    | Y | N | Y | 17 |
| Savithra Prakash   | Prescriber (pharmacist) Knowledge/practice | Y | Y | N/dn | Y | Y | Y | N   | Y | d/n | N | Y/dn | N | N    | N    | N/dn | Y | Y/dn | Y | N | Y | 13 |
| Tripathi R 2020    | Prescriber Knowledge/practice              |   |   | N/dn |   |   | N |     |   |     |   |      |   | Y    | N    | Y    | Y | Y    | Y | N |   | 14 |
| Kaul R 2021        | Prescriber Knowledge/practice              |   |   |      |   |   |   |     |   |     |   |      |   | N    |      |      |   |      | Y | N | Y | 16 |

**Table S3. b:** Quality assessment for qualitative study (Ahmed S) using JBI Critical Appraisal tool.

| Assessment                                                                                       | Yes | No | Unclear | Not Applicable |
|--------------------------------------------------------------------------------------------------|-----|----|---------|----------------|
| 1. Is there congruity between the stated philosophical perspective and the research methodology? |     | ✓  |         |                |
| 2. Is there congruity between the research methodology and the research question or objectives?  | ✓   |    |         |                |

|     |                                                                                                                                                 |   |   |
|-----|-------------------------------------------------------------------------------------------------------------------------------------------------|---|---|
| 3.  | Is there congruity between the research methodology and the methods used to collect data?                                                       | ✓ |   |
| 4.  | Is there congruity between the research methodology and the representation and analysis of data?                                                | ✓ |   |
| 5.  | Is there congruity between the research methodology and the interpretation of results?                                                          |   | ✓ |
| 6.  | Is there a statement locating the researcher culturally or theoretically?                                                                       | ✓ |   |
| 7.  | Is the influence of the researcher on the research, and vice- versa, addressed?                                                                 |   | ✓ |
| 8.  | Are participants, and their voices, adequately represented?                                                                                     | ✓ |   |
| 9.  | Is the research ethical according to current criteria or, for recent studies, and is there evidence of ethical approval by an appropriate body? | ✓ |   |
| 10. | Do the conclusions drawn in the research report flow from the analysis, or interpretation, of the data?                                         | ✓ |   |

**Table S4.** Types and regimen of antibiotics identified.

| Scheme | Type of Antibiotic                                                        | Regimen Used                                  | WHO AWaRe Category | Drug Included in WHO National Essential Drugs List, India |
|--------|---------------------------------------------------------------------------|-----------------------------------------------|--------------------|-----------------------------------------------------------|
| 1      | Amoxycillin [31–33,37,44,45,51–53,55,56,65–75,77,79,81,83,85,86]          | 250mg bd or tds<br>500mg bd or tds            | Access             | Y                                                         |
| 2      | Amoxicillin + Clavulanic acid [31,32,37,51–53,65–70,72,74,75,79,80,83,86] | 375 mg tds<br>500mg bd<br>625 mg bd/ tds [69] | Access             | Y                                                         |
| 3      | Penicillin V [73]                                                         | NS                                            | Access             | N                                                         |
| 4      | Ampicillin [52,68]                                                        | NS                                            | Access             | Y                                                         |
| 5      | Cloxacillin [68]                                                          | NS                                            | Access             | Y                                                         |
| 6      | Dicloxacillin [68]                                                        | NS                                            | Access             | N                                                         |
| 7      | Amoxicillin+ cloxacillin [32,54,55,65,67–69,75]                           | 250mg + 250mg tds<br>250mg + 500mg tds        | N/R by the WHO     | n/a                                                       |
| 8      | Ampicillin with cloxacillin [37,52,68,83]                                 | NS                                            | N/R by the WHO     | n/a                                                       |
| 9      | Amoxicillin + metronidazole [31,32,67,69,78]                              | 250mg + 400 mg [32,69]<br>500 mg + 400mg [32] | N/R by the WHO     | n/a                                                       |
| 10     | Amoxicillin+ Clavulanic acid 625mg + metronidazole 400mg [32,70,71]       | Bd/ tds                                       | N/R by the WHO     | n/a                                                       |
| 11     | Amoxicillin+ Cloxacillin 500mg + metronidazole 400mg [32]                 | bd                                            | N/R by the WHO     | n/a                                                       |
| 12     | Cefadroxil [32,65,72]                                                     | 500 mg bd                                     | Access             | Y                                                         |
| 13     | Cephalexin [32,65,68–72,77]                                               | 500mg bd                                      | Access             | N                                                         |
| 14     | Cefixime [32,53,56,65,68,72,83]                                           | 200 mg od/ bd                                 | Watch              | Y                                                         |
| 15     | Cefuroxime [65]                                                           | NS                                            | Watch              | N                                                         |
| 16     | Cephalosporins Unspecified [74,78]                                        | NS                                            | variable           | variable                                                  |
| 17     | Metronidazole [32,33,37,44,45,51–53,55,65–68,70,73–75,83]                 | 400 mg tds                                    | Access             | Y                                                         |
| 18     | Ornidazole [32,56]                                                        | 500mg Bd                                      | Watch              | N                                                         |

|    |                                                      |                                           |                |                                            |
|----|------------------------------------------------------|-------------------------------------------|----------------|--------------------------------------------|
| 19 | Tetracycline [32,37,45,68,85,86]                     | NS                                        | Access         | N                                          |
| 20 | Doxycycline [32,33,45,51,56,65,67–69,73,74,78,85]    | 100mg Od/ bd                              | Access         | Y                                          |
| 21 | Erythromycin [31–33,65,66,68,69,72,73,81]            | 500 mg bd<br>500 mg od/ tds               | Watch          | Y                                          |
| 22 | Roxythromycin [53,68]                                | NS                                        | Watch          | N                                          |
| 23 | Azithromycin [31,32,52,53,65,66,68,72,83]            | 500 mg od/ tds                            | Watch          | Y                                          |
| 24 | Lincomycin [65]                                      | NS                                        | Watch          | N                                          |
| 25 | Gentamycin [67,74]                                   | NS                                        | Access         | Y                                          |
| 26 | Clindamycin [31,32,52,65,66,68,71,73,77,79,81]       | 300 mg bd                                 | Access         | Y                                          |
| 27 | Ciprofloxacin [32,33,52,53,56,65,67–69,72,74,75,83]  | 200 mg bd<br>500 mg bd/ tds <sup>69</sup> | Watch          | Y                                          |
| 28 | Ofloxacin [32,56,65,68,74,79,83]                     | 200 mg bd<br>400 mg bd                    | Watch          | N                                          |
| 29 | Levofloxacin [32,53]                                 | 500mg od                                  | Watch          | Y (listed under anti-tubercular medicines) |
| 30 | Norfloxacin [65]                                     | NS                                        | Watch          | N                                          |
| 31 | Cotrimoxazole (trimethoprim + sulfamethoxazole) [68] | NS                                        | Access         | Y                                          |
| 32 | Ciprofloxacin+ tinidazole [66,68,72,74,83]           | 500mg + 300mg bd<br>500+ 600 mgbd         | N/R by the WHO | n/a                                        |
| 33 | Ofloxacin+ ornidazole [31,44,51,66–72,79,83]         | 200mg + 500mg bd/ tds                     | N/R by the WHO | n/a                                        |

Y- Yes; N- No; N/R Not Recommended; n/a not applicable (as combination antibiotics); Access: This group includes antibiotics that have activity against a wide range of commonly encountered susceptible pathogens while also showing lower resistance potential than antibiotics in the other groups; Watch: This group includes antibiotic classes that have higher resistance potential and includes most of the highest priority agents among the Critically Important Antimicrobials for Human Medicine (ref, critically important meds, 6<sup>th</sup> revision 2018), and/or antibiotics that are at relatively high risk of selection of bacterial resistance. These medicines should be prioritized as key targets of stewardship programs and monitoring. .
